# Supplementary material
Source: publisher figshare collection journal article supplement (https://future-science-group.figshare.com/ndownloader/files/31128847)
Supplement: Supplementary file 1 [file 31128847]

Supplemental Table 1. Full list of Signs and Symptoms Endorsed during Patient Interviews

| **Patient Endorsed Signs and Symptoms** | | | | | | | | | | |
| --- | --- | --- | --- | --- | --- | --- | --- | --- | --- | --- |
|  | |  | |  | |  | |  | |  |
| ***nmCRPC/mHSPC*** | |  | |  | |  | |  | |  |
| **General** | **Laboratory Testing/Signs** | | **Musculoskeletal** | | **Gastrointestinal** | | **Urinary** | | **Other** | |
| Fatigue | Bone shadow | | Back pain | | Diarrhea | | Blood in urine/ hematuria | | Testicular swelling | |
| Hot flashes | High liver levels | | Groin pain | | Stomach pain | | Frequent urination | | Decrease in sexual function | |
| Loss of sleep | High PSA levels | | Leg cramps | |  | | Flow of urine | |  | |
| Pain | PSA increase | | Numbness in legs | |  | | Nocturia | |  | |
| Rash |  | | Pelvic pain | |  | | Residual urine | |  | |
|  |  | | Sacrum pain | |  | | Ureteral stones | |  | |
|  |  | | Spinal cord stenosis | |  | | Weak bladder | |  | |
| ***Metastatic CRPC*** |  | |  | |  | |  | |  | |
| **General** | **Laboratory Testing/Signs** | | **Musculoskeletal** | | **Gastrointestinal** | | **Urinary** | | **Other** | |
| Bleeding | PSA increase | | Bone fracture | | Blood in stool | | Bladder infection | | Anemia | |
| Discomfort | Bone shadow | | Back pain | | Constipation | | Bladder polyps | | Arrhythmia | |
| Dizziness |  | | Bone pain | | Diarrhea | | Blood in urine | | Blood platelet count | |
| Edema |  | | Broken arm | | Nausea | | Frequent urination | | Chest pain | |
| Fatigue |  | | Groin pain | | Vomiting | | Nocturia | | Pus in lungs | |
| Hot flashes |  | | Hand pain | |  | | Residual urine | | Shortness/Out of breath | |
| Itch |  | | Hip pain | |  | | Urinary retention | | Weakening immunity | |
| Loss of weight |  | | Muscle loss | |  | | Weak flow | |  | |
| Numbness |  | | Muscle pain | |  | |  | |  | |
| Pain |  | | Sacrum pain | |  | |  | |  | |
| Sweating |  | | Stiffness in hand | |  | |  | |  | |
| Swelling |  | | Weak legs | |  | |  | |  | |
| Sensivity to temperature |  | |  | |  | |  | |  | |
